# Supplementary material for: A poly(styrene-co-acrylonitrile) gel electrolyte for dye-sensitized solar cells with improved photoelectrochemical performance
Source: Royal Society of Chemistry journal article supplement (doi:10.1039/d0nj04318d), 2020-01-01
Supplement: d0nj04318d1.pdf [file d0nj04318d1.pdf]

## Supplementary Information:

### Poly(styrene-co-acrylonitrile) Gel Electrolyte for Dye-sensitized Solar Cells with Improved Photoelectrochemical Performance

Sadia Shahbaz<sup>a, b</sup>, Asif Ali Tahir<sup>b</sup>, Tappas Malick<sup>b</sup>, Idris Al Siyabi<sup>b</sup>, Bandar Y Alfaifi<sup>b</sup>, Safeer Ahmed<sup>a, \*</sup>

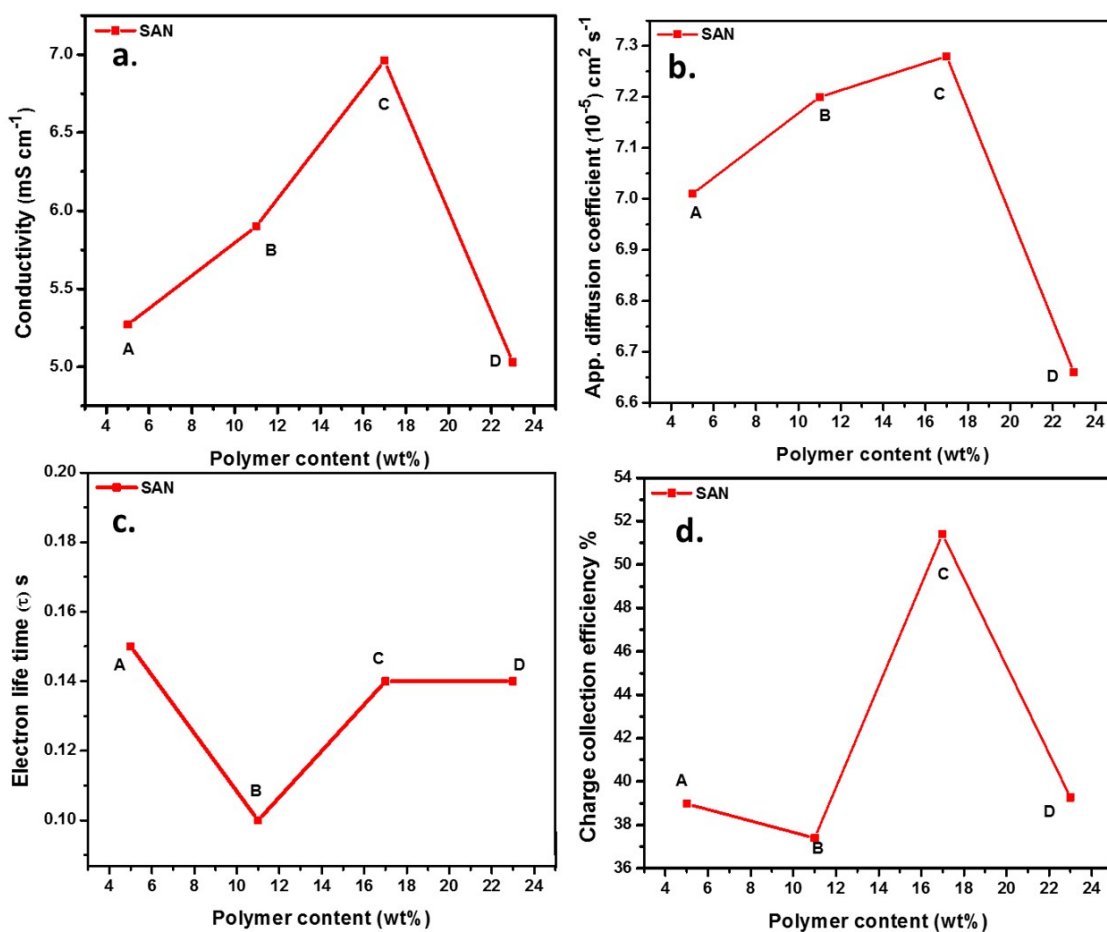

**Figure S1:** Variation in (a) charge collection efficiency (%  $\eta_{cc}$ ), (b) electron lifetime ( $\tau$ ), (c) ionic conductivity ( $\sigma$ ) and (d) diffusion coefficient values ( $D_{app}$ ) of SAN based PGE.

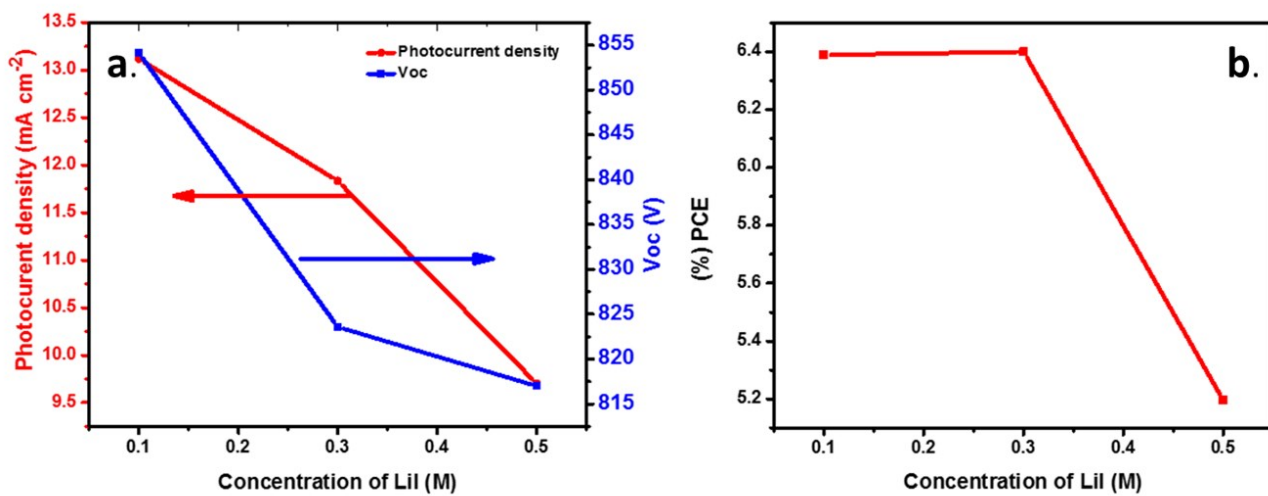

**Figure S2:** Effect of variable concentrations of LiI on (a) photovoltaic parameters and (b) photovoltaic performance of SAN based quasi solid-state electrolytes at a given concentration.

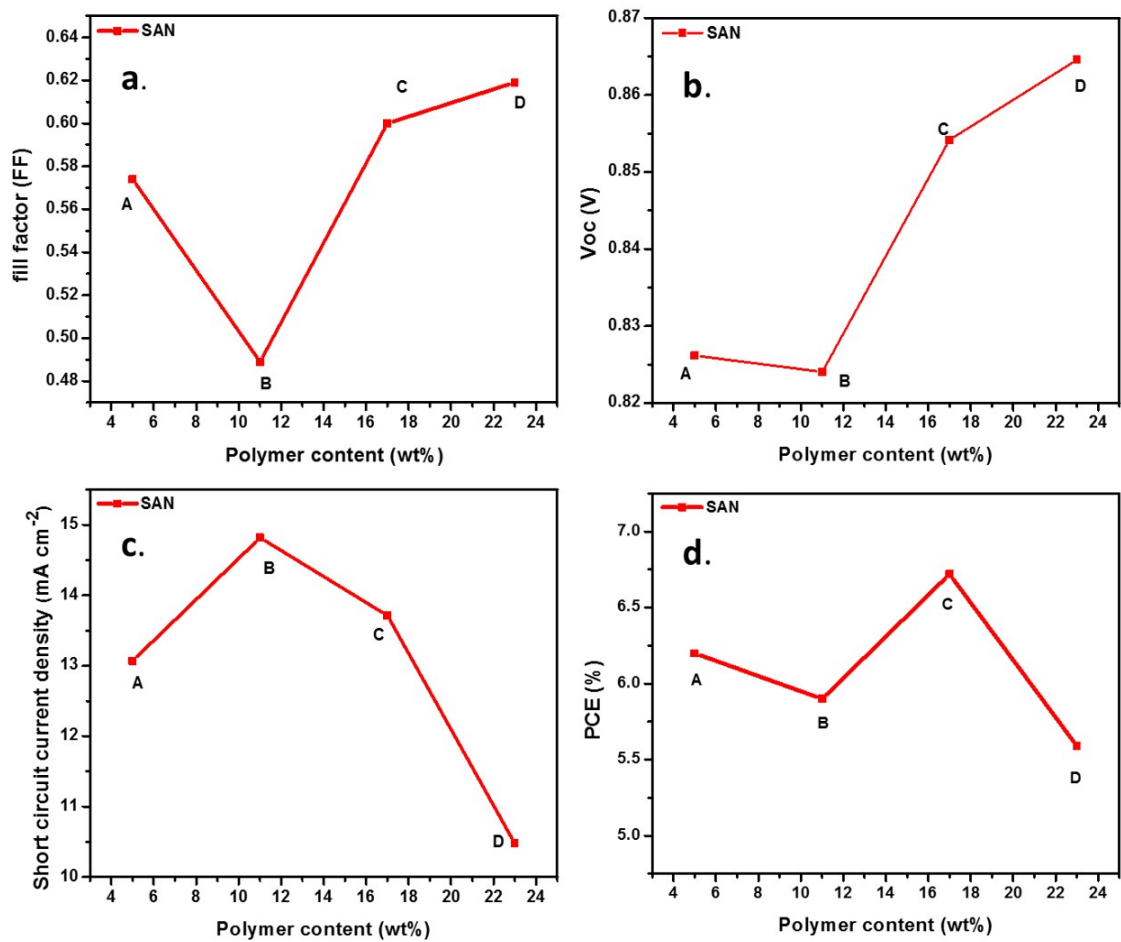

**Figure S3:** Variation in the photovoltaic properties of quasi solid state dye sensitized solar cells for different wt% of SAN based PGE.
